# Supplementary material
Source: publisher figshare collection journal article supplement (https://tandf.figshare.com/ndownloader/files/36015306)
Supplement: Supplementary file 1 [file 36015306]

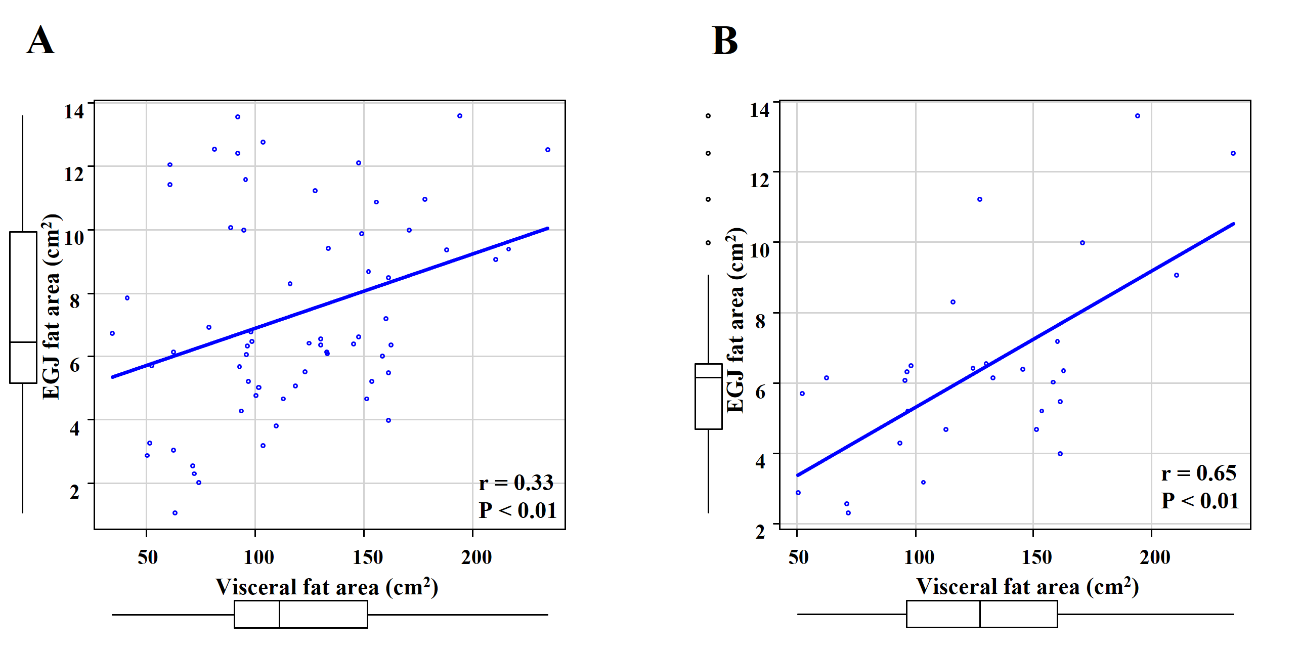


**Supplementary Figure 1.** Correlation coefficients between the EGJ fat areas and visceral fat areas among the entire EGJAC cases (A) and EGJAC cases with absent- or closed-type gastric mucosal atrophy (B). EGJ: esophago-gastric junction, EGJAC: esophago-gastric junctional adenocarcinoma.
